# Supplementary material for: Reactivity-guided formulation of composite solid polymer electrolytes for superior sodium metal batteries
Source: Royal Society of Chemistry journal article supplement (doi:10.1039/d1ta05490b), 2021-01-01
Supplement: d1ta05490b1.pdf [file d1ta05490b1.pdf]

## Supporting Information

### **Reactivity-Guided Formulation of Composite Solid Polymer Electrolytes for Superior Sodium Metal Batteries**

*Edward Matios, Huan Wang, Jianmin Luo, Yiwen Zhang, Chuanlong Wang, Xuan Lu, Xiaofei Hu, Ying Xu, and Weiyang Li\**

$$\sigma = \frac{T}{AR_t}$$

**Equation S1.** Ionic conductivity ( $\sigma$ ) of an electrolyte based on the EIS result of SS/SS cells, where  $A$  is the electrolyte cross-sectional area,  $T$  is the electrolyte thickness, and  $R_t$  is the electrolyte resistance.

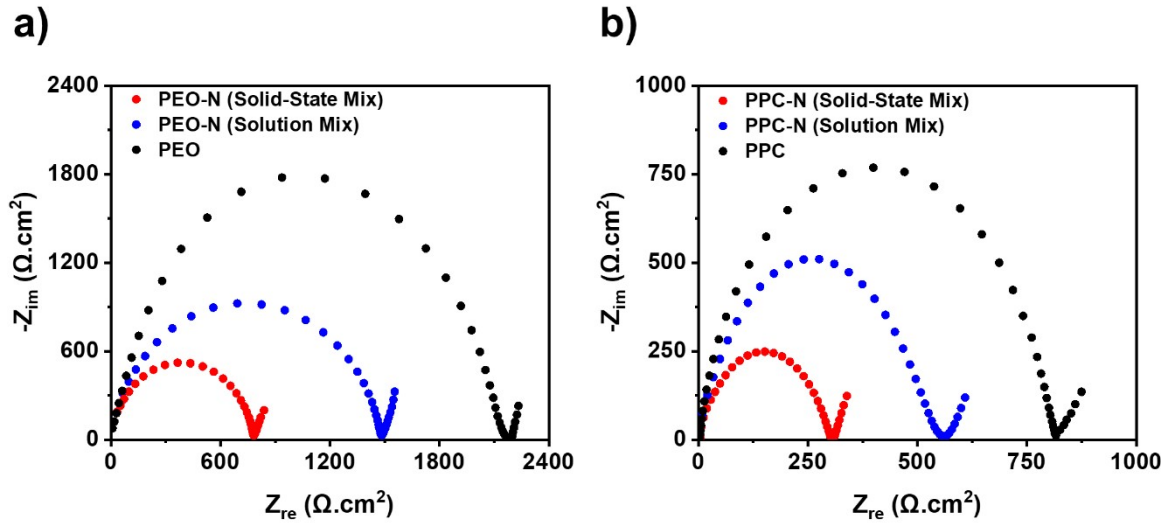

**Figure S1.** EIS measurements for ionic conductivity: SS/SS cells with a) pristine PEO, PEO-N prepared by conventional solution mixing as well as by solid-state reaction; and b) pristine PPC, PPC-N prepared by conventional solution mixing as well as by solid-state reaction.

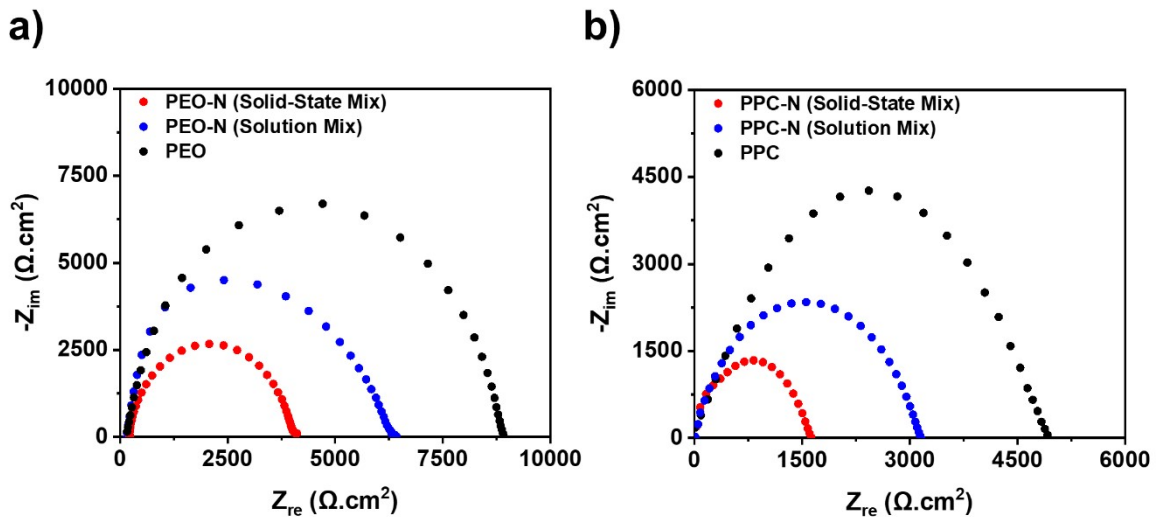

**Figure S2.** EIS measurements for interfacial impedance: Na/Na cells with a) pristine PEO, PEO-N prepared by conventional solution mixing as well as by solid-state reaction; and b) pristine PPC, PPC-N prepared by conventional solution mixing as well as by solid-state reaction.

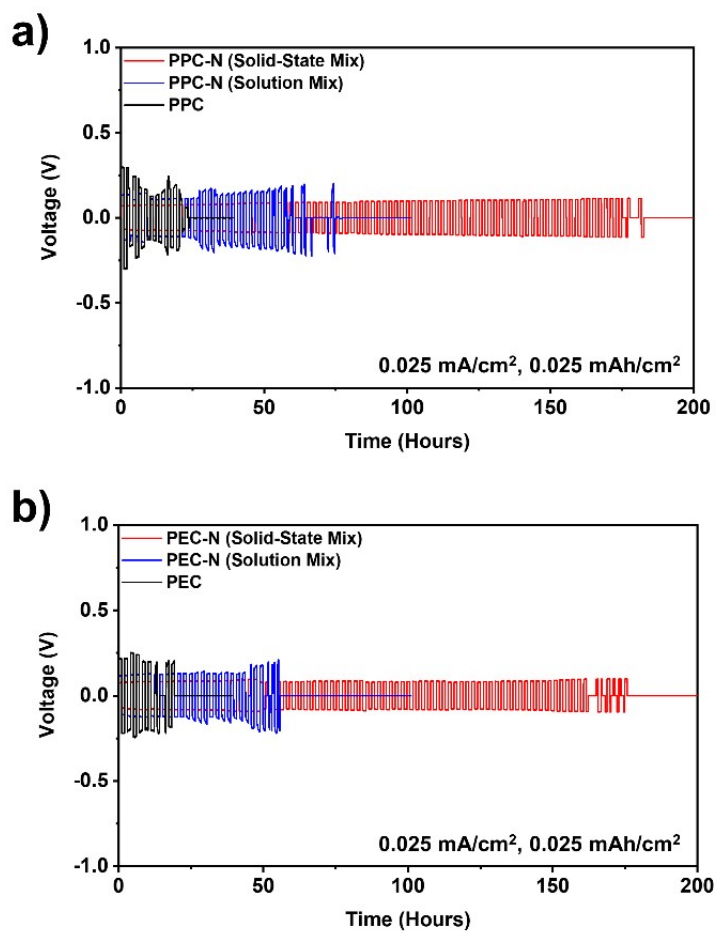

**Figure S3.** Electrochemical cycling performances of symmetric Na/Na cells at 0.025 mA/cm<sup>2</sup> current density and 0.025 mAh/cm<sup>2</sup> capacity with a) pristine PPC, PPC-N prepared by conventional solution mixing as well as by solid-state reaction; and b) pristine PEC, PEC-N prepared by conventional solution mixing as well as by solid-state reaction.

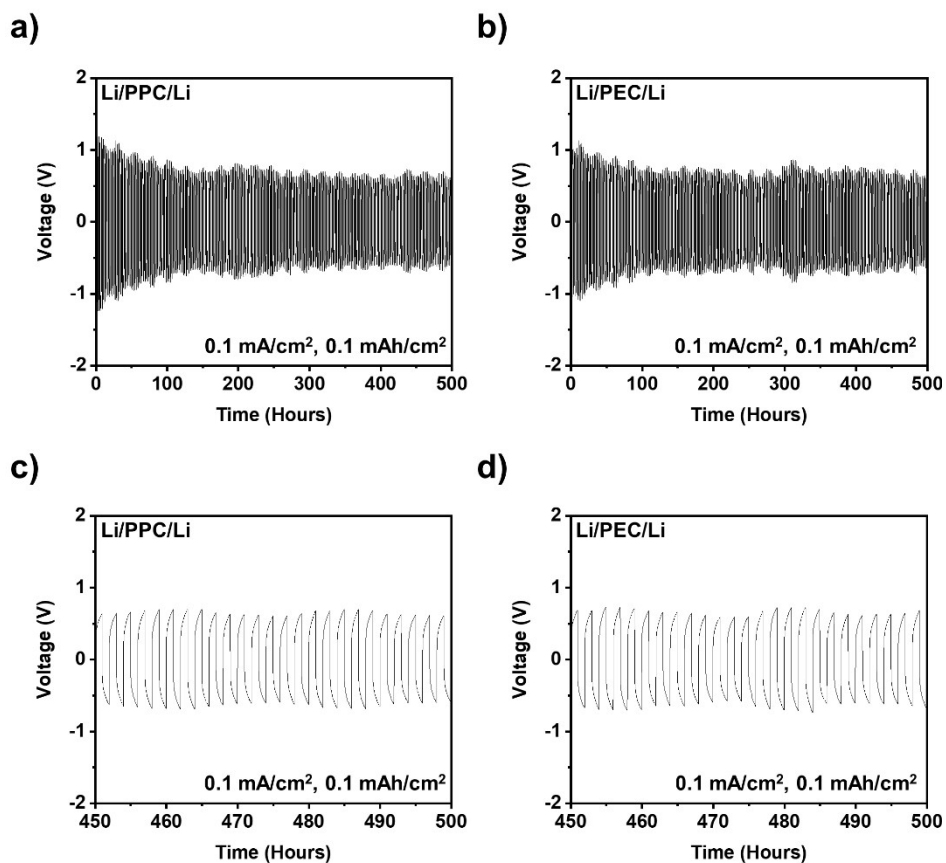

**Figure S4.** Electrochemical cycling performances of symmetric Li/Li cells at 0.1 mA/cm<sup>2</sup> current density and 0.1 mAh/cm<sup>2</sup> capacity with a) pristine PPC, b) pristine PEC, c) last 50 hours of Li/PPC/Li cycling, d) last 50 hours of Li/PEC/Li cycling.

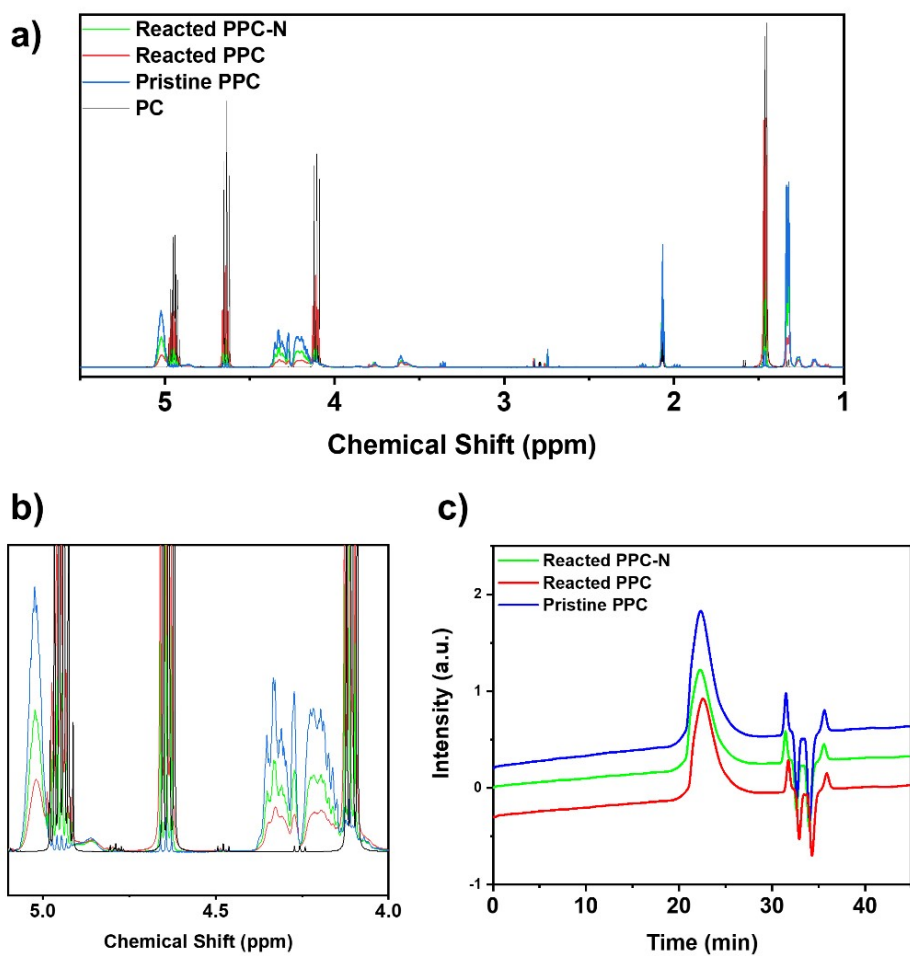

**Figure S5.** Quantification on the molar quantity of PPC before and after reacting with Na metal. a) H-NMR signals of pristine PPC, reacted PPC, reacted PPC-N and PC. b) Close-up H-NMR data for a better contrast in the differences between integral areas. c) GPC signals of pristine PPC, reacted PPC, reacted PPC-N.

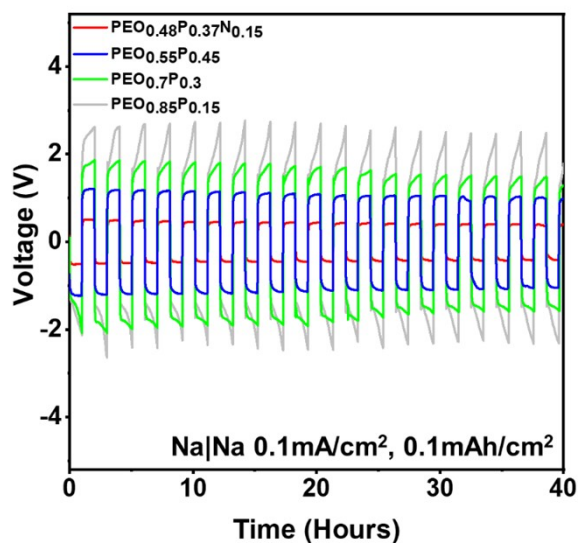

**Figure S6.** The first 40 hours of Na/Na cells cycling data from Figure 4a.

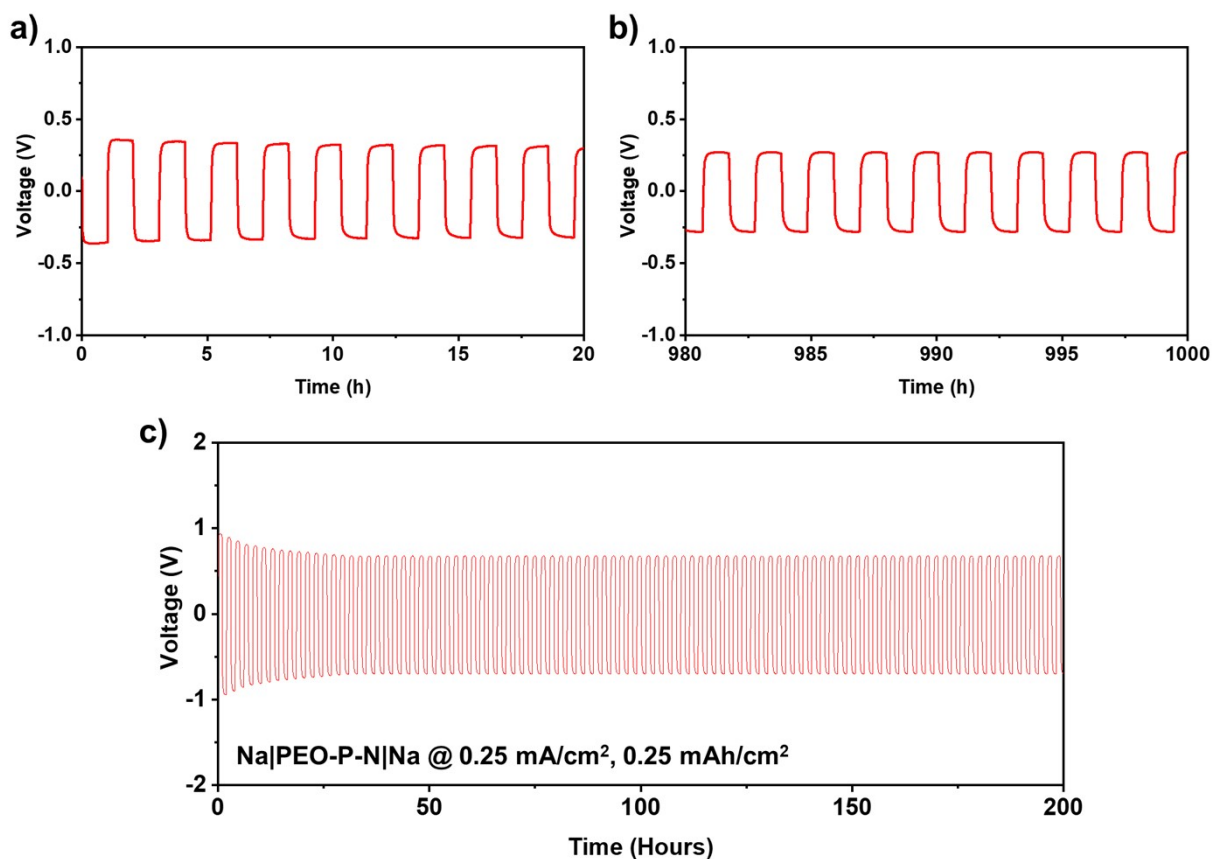

**Figure S7.** Na/Na cells cycling at 0.1 mA/cm<sup>2</sup> and 0.1 mAh/cm<sup>2</sup> with PEO-P-N for 1000 hours: a) first 20 hours, b) last 20 hours. c) 0.25 mA/cm<sup>2</sup> and 0.25 mAh/cm<sup>2</sup> for 100 cycles.

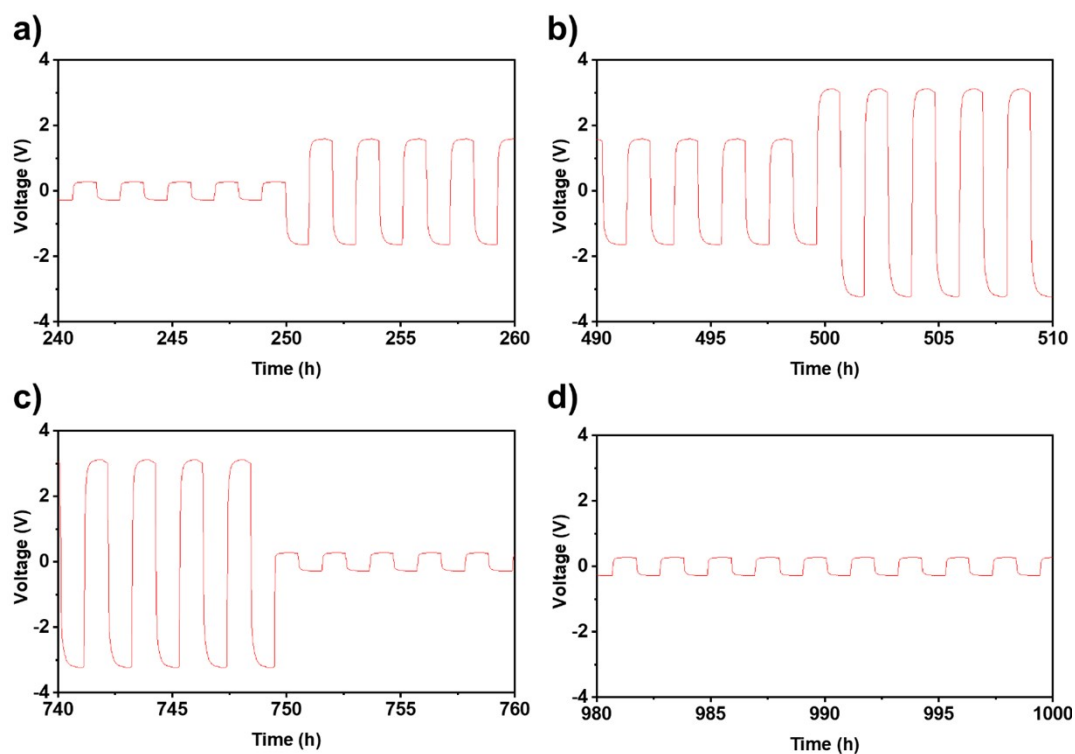

**Figure S8.** Na/Na cells cycling at 0.1 mA/cm<sup>2</sup>, 0.5 mA/cm<sup>2</sup> and 1 mA/cm<sup>2</sup> with PEO-P-N: a) 0.1 to 0.5 mA/cm<sup>2</sup>, b) 0.5 to 1 mA/cm<sup>2</sup>, c) 1 to 0.5 mA/cm<sup>2</sup> and d) final 10 cycles.

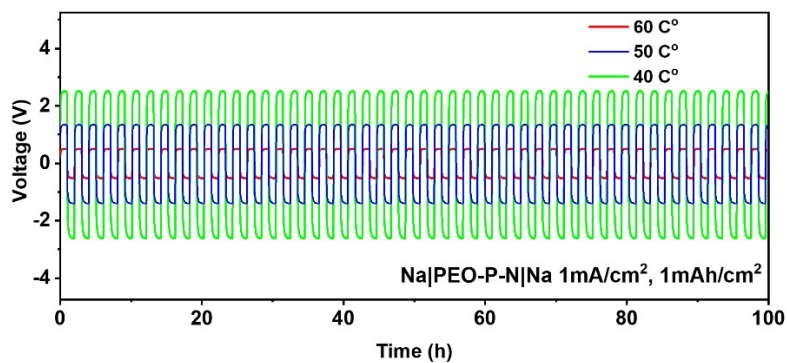

**Figure S9.** Electrochemical cycling performances at 40 °C, 50 °C, and 60 °C for Na/Na cells with PEO-P-N cycling at 1 mA/cm<sup>2</sup> rate and 1 mAh/cm<sup>2</sup> capacity.

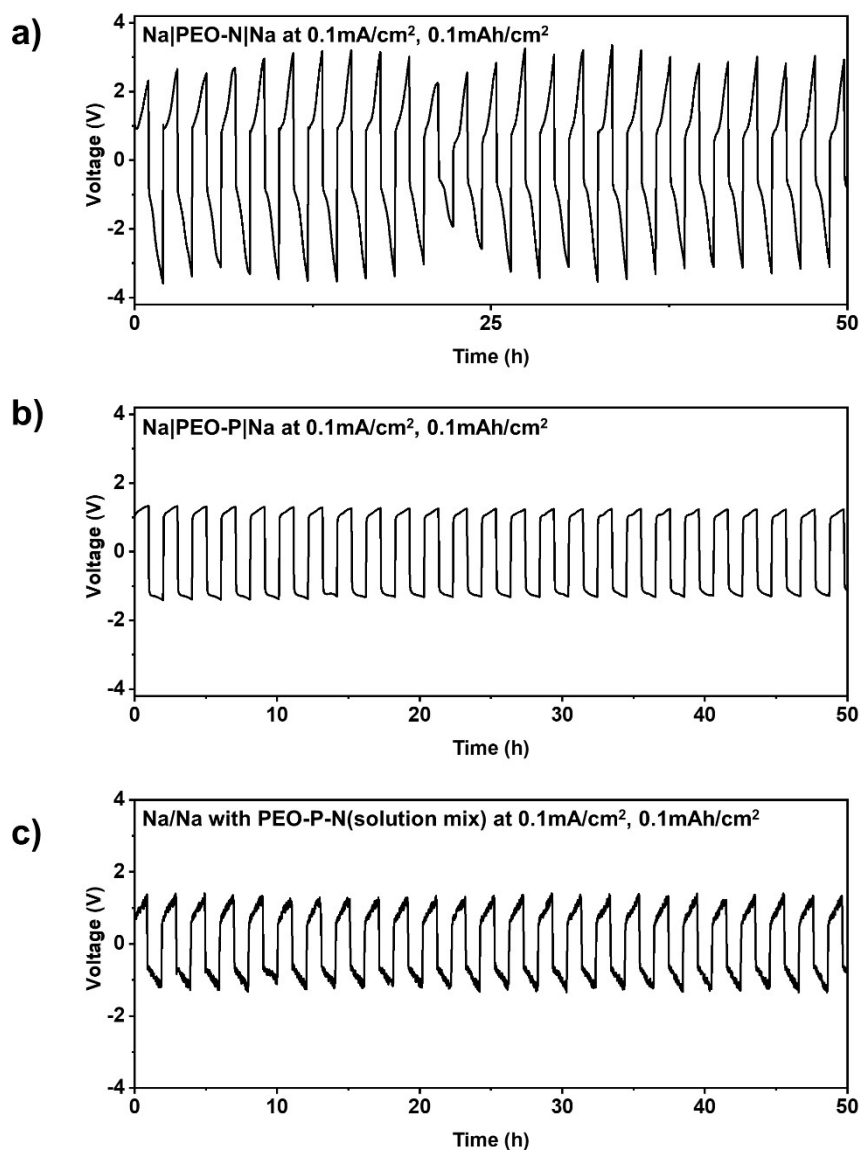

**Figure S10.** Control experiments of Na/Na cells electrochemical cycling at 0.1 mA/cm<sup>2</sup> current density and 0.1 mAh/cm<sup>2</sup> capacity with the less optimized SPEs, namely a) PEO-N, b) PEO-P and c) PEO-P-N prepared by conventional solution mixing method.

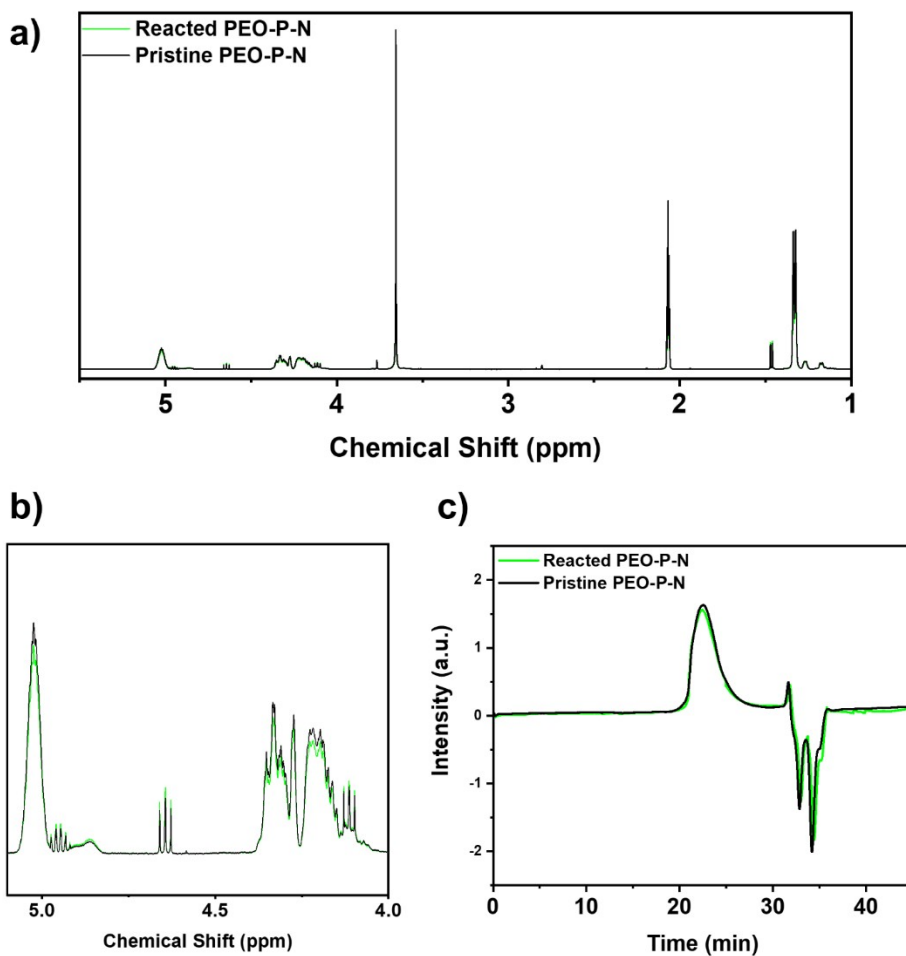

**Figure S11.** Quantification on the molar quantity of PEO-P-N before and after reacting with Na metal. a) H-NMR signals of pristine PEO-P-N and reacted PEO-P-N. b) Close-up H-NMR data for a better contrast in the differences between integral areas. c) GPC signals of pristine PEO-P-N and reacted PEO-P-N.

**Table S1.** H-MNR and GPC data for PEO-P-N reacted with Na for various time durations.

|              | <b>1 Day</b>                   | <b>1 Month</b>   | <b>3 Months</b>  | <b>6 Months</b>  |
|--------------|--------------------------------|------------------|------------------|------------------|
| <b>H-NMR</b> | 99.6% $\pm$ 0.1% <sup>a)</sup> | 99.4% $\pm$ 0.1% | 99.4% $\pm$ 0.1% | 99.4% $\pm$ 0.1% |
| <b>GPC</b>   | 99.7% $\pm$ 0.1%               | 99.5% $\pm$ 0.1% | 99.5% $\pm$ 0.1% | 99.5% $\pm$ 0.1% |

<sup>a)</sup> Integral area under the curve from H-NMR and GPC quantification analysis.



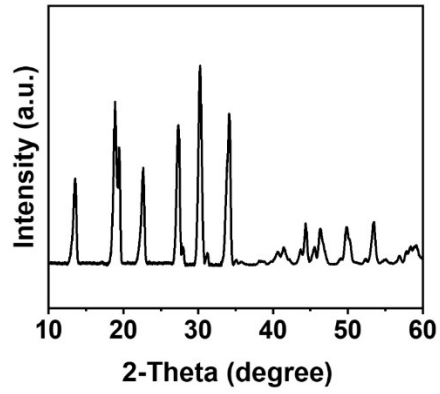

**Figure S12.** The XRD pattern of NASICON with typical crystalline peaks.

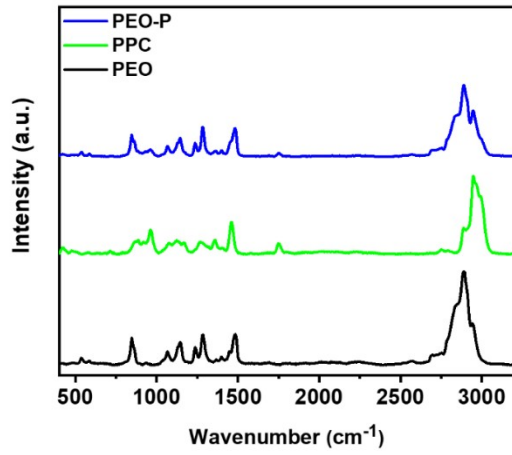

**Figure S13.** Raman spectroscopy for studying the chemical structures of various SPEs.

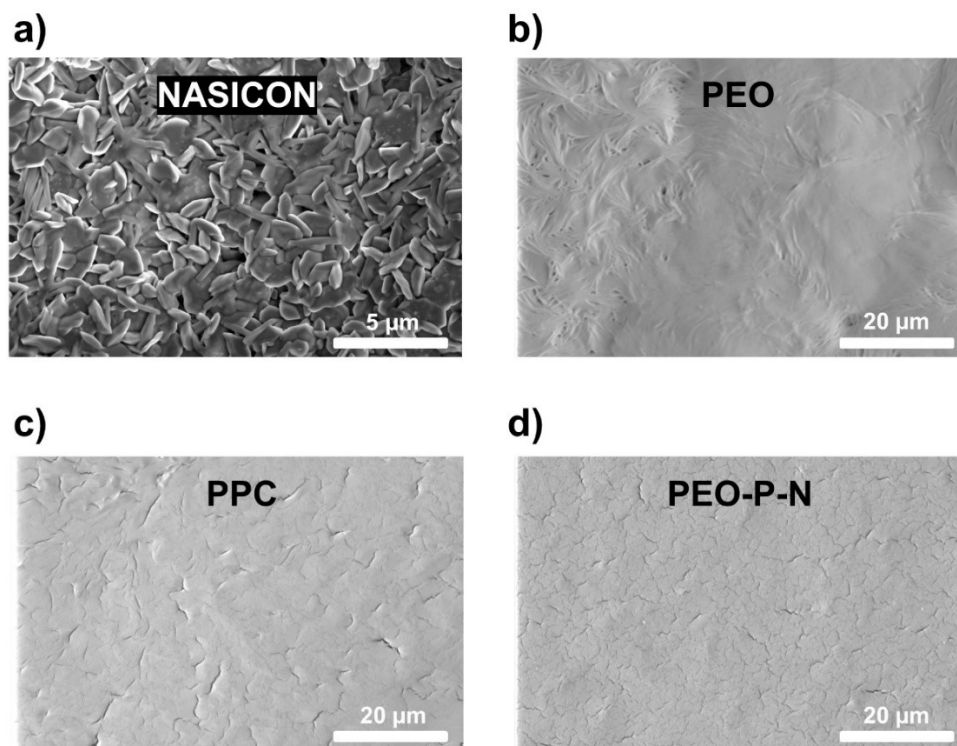

**Figure S14.** SEM imaging for a) NASICON, b) PEO, c) PPC and d) PEO-P-N.

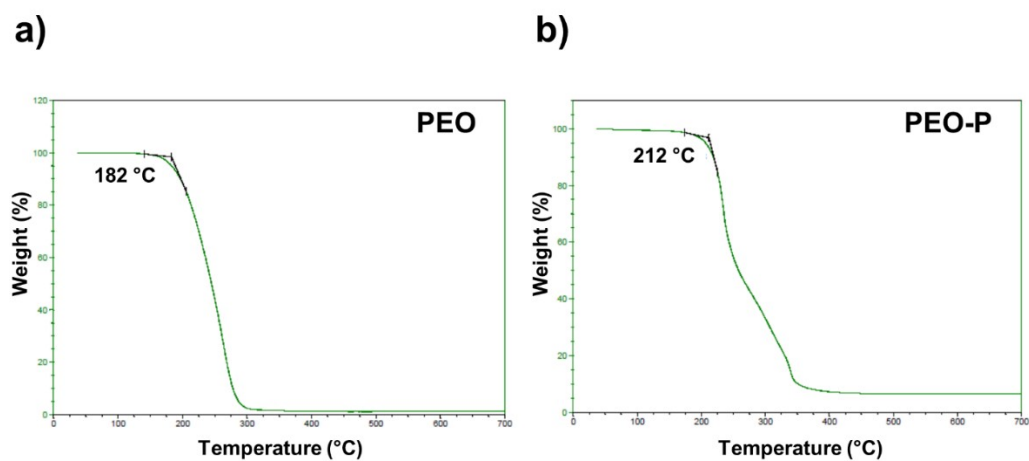

**Figure S15.** TGA analysis for the thermal stability study of a) PEO and b) PEO-P.

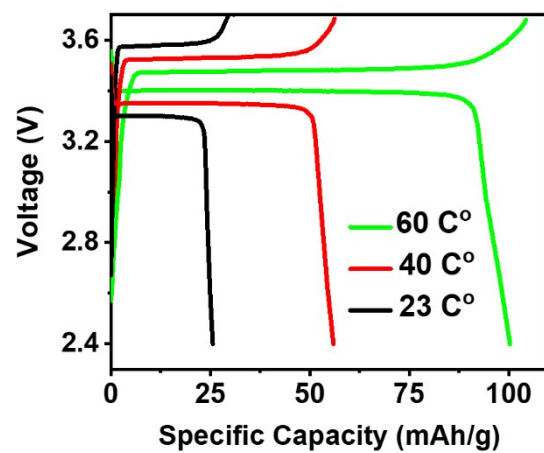

**Figure S16.** NVP/PEO-P-N/Na solid-state batteries discharge capacity at 1C rate at 23 °C (room temperature), 40 °C, and 60 °C.
